# Supplementary material for: Clarifying the Use of Aggregated Exposures in Multilevel Models: Self-Included vs. Self-Excluded Measures
Source: PubMed Central journal article supplement (PMC3519740; doi:10.1371/journal.pone.0051717), 2012-12-10
Supplement: pone.0051717.s001.pdf [file pone.0051717.s001.pdf]

## Clarifying the Use of Aggregated Exposures in Multilevel Models: Self-Included vs. Self-Excluded Measures

Etsuji Suzuki, Eiji Yamamoto, Soshi Takao, Ichiro Kawachi, S. V. Subramanian

### Text S1: Sample covariance between individual- and group-level social capital variables in models 1, 2a, and 3a

Unlike the cluster-mean centering procedure (model 2a), the self-exclusion procedure (model 3a) cannot completely evade the collinearity problem encountered in model 1. Below, we compare the sample covariance between individual- and group-level social capital variables in models 1, 2a, and 3a. Symbols are as defined in the main text. In addition, we define the total number of individuals as  $N$  and the number of groups as  $J$ . Therefore, the mean of individual-level social capital score for all individuals is  $\bar{x} = \sum_{ij} x_{ij} / N = \sum_j n_j \bar{x}_j / N$ .

In model 1 (self-included model without cluster-mean centering), the sample covariance between individual-level social capital ( $x_{ij}$ ) and group-level social capital ( $\bar{x}_j$ ) is calculated as follows:

$$\begin{aligned}
 S_{\text{model 1}}^2 &= \frac{\sum_{ij} (x_{ij} - \bar{x})(\bar{x}_j - \bar{x})}{N - 1} \\
 &= \frac{\sum_{ij} \{(x_{ij} - \bar{x}_j) + (\bar{x}_j - \bar{x})\}(\bar{x}_j - \bar{x})}{N - 1} \\
 &= \frac{\sum_{ij} (x_{ij} - \bar{x}_j)(\bar{x}_j - \bar{x})}{N - 1} + \frac{\sum_{ij} (\bar{x}_j - \bar{x})^2}{N - 1} \\
 &= \frac{\sum_{ij} (\bar{x}_j - \bar{x})^2}{N - 1} \left( \because \sum_i (x_{ij} - \bar{x}_j) = 0 \text{ for } \forall j \right) \\
 &= \frac{\sum_j n_j (\bar{x}_j - \bar{x})^2}{N - 1} \\
 &= S_B^2,
 \end{aligned}$$

which is a *Weighted Between Clusters Variance*. Note that this equation describes the variance of the within-cluster means.

In model 2a (self-included model with cluster-mean centering), since the mean of cluster-mean centered individual-level social capital ( $x_{ij} - \bar{x}_j$ ) is 0, the sample covariance between cluster-mean centered individual-level social capital ( $x_{ij} - \bar{x}_j$ ) and group-level social capital ( $\bar{x}_j$ ) is

$$\begin{aligned} S_{\text{model 2a}}^2 &= \frac{\sum_{ij} (x_{ij} - \bar{x}_j)(\bar{x}_j - \bar{x})}{N-1} \\ &= 0. \end{aligned}$$

Thus, as noted previously [1,2], in this model, individual-level social capital variable is orthogonal to its group-level counterpart.

In model 3a (self-excluded model without cluster-mean centering), the sample covariance between individual-level social capital ( $x_{ij}$ ) and self-excluded group-level social capital ( $\bar{x}_{j\setminus i}$ ) is calculated as

$$\begin{aligned} S_{\text{model 3a}}^2 &= \frac{\sum_{ij} (x_{ij} - \bar{x})(\bar{x}_{j\setminus i} - \bar{x})}{N-1} \\ &= \frac{\sum_{ij} \left\{ (x_{ij} - \bar{x}_j) + (\bar{x}_j - \bar{x}) \right\} \left\{ (\bar{x}_j - \bar{x}) - \frac{x_{ij} - \bar{x}_j}{n_j - 1} \right\}}{N-1} \quad \left( \because n_j \bar{x}_j = (n_j - 1) \bar{x}_{j\setminus i} + x_{ij} \right) \\ &= \frac{\sum_{ij} (x_{ij} - \bar{x}_j)(\bar{x}_j - \bar{x})}{N-1} + \frac{\sum_{ij} (\bar{x}_j - \bar{x})^2}{N-1} - \sum_{ij} \frac{(x_{ij} - \bar{x}_j)^2}{(N-1)(n_j - 1)} - \sum_{ij} \frac{(\bar{x}_j - \bar{x})(x_{ij} - \bar{x}_j)}{(N-1)(n_j - 1)} \\ &= \frac{\sum_j n_j (\bar{x}_j - \bar{x})^2}{N-1} - \frac{\sum_j S_{wj}^2}{N-1} \quad \left( \because \sum_i (x_{ij} - \bar{x}_j) = 0 \text{ for } \forall j \right) \\ &= S_B^2 - \frac{J}{N-1} \bar{S}_w^2, \end{aligned}$$

where  $S_{wj}^2 = \sum_i (x_{ij} - \bar{x}_j)^2 / (n_j - 1)$  and  $\bar{S}_w^2 = \sum_j S_{wj}^2 / J$ . The former is a *Within Cluster Variance*, and the latter is the *mean of Within Cluster Variances*. Although the self-exclusion procedure (model 3a) can possibly mitigate part of the collinearity problem encountered in model 1, it does not offer a robust solution like model 2a. If cluster size is unvarying, the sample covariance between individual-level social capital ( $x_{ij}$ ) and self-excluded group-level

social capital ( $\bar{x}_{j|i}$ ) is calculated as follows:

$$\begin{aligned}
 S_{\text{model 3a}}^2 &= \frac{\sum_j n_j (\bar{x}_j - \bar{x})^2}{N-1} - \frac{\sum_j S_{wj}^2}{N-1} \\
 &= S_B^2 - \frac{N}{N-1} \frac{\sum_j S_{wj}^2}{nJ} \\
 &= S_B^2 - \frac{N}{N-1} \frac{\bar{S}_w^2}{n} \\
 &\approx S_B^2 - \frac{\bar{S}_w^2}{n},
 \end{aligned}$$

which describes the variance of the within-cluster means ( $S_B^2$ ) minus the mean of within-cluster variances divided by cluster size ( $\bar{S}_w^2/n$ ). When the group-level random effect of the intercept is zero,  $S_B^2$  is approximately consistent and equal to  $\bar{S}_w^2/n$ , implying that  $S_{\text{model 3a}}$  is also zero. By contrast, when the group-level random effect of the intercept is non-zero,  $S_B^2$  increases while  $\bar{S}_w^2/n$  does not change. Thus,  $S_{\text{model 3a}}$  is expected to increase as the group-level random effect of the intercept increases.

## References

1. Raudenbush SW, Bryk AS (2002) Hierarchical Linear Models: Applications and Data Analysis Methods. Thousand Oaks, CA: Sage Publications.
2. Bingenheimer JB, Raudenbush SW (2004) Statistical and substantive inferences in public health: issues in the application of multilevel models. *Annu Rev Public Health* 25: 53-77.
